# Supplementary material
Source: PubMed Central journal article supplement (PMC1458987)

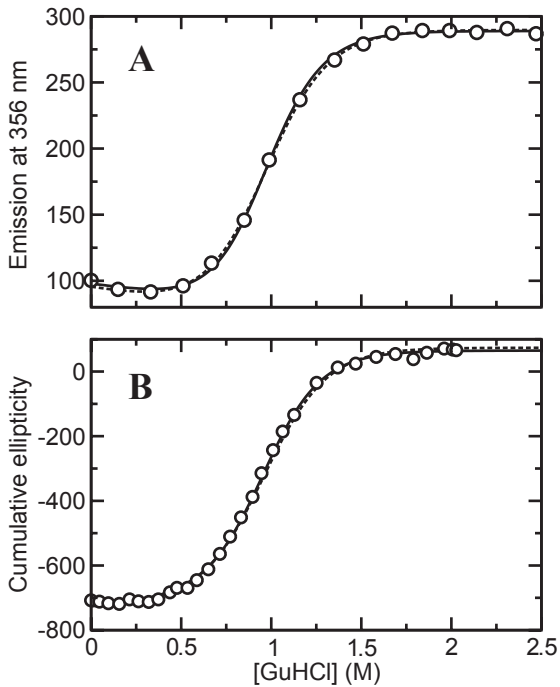

Supplement: pnas_0509100103_1.pdf [file pnas_0509100103_1.pdf]

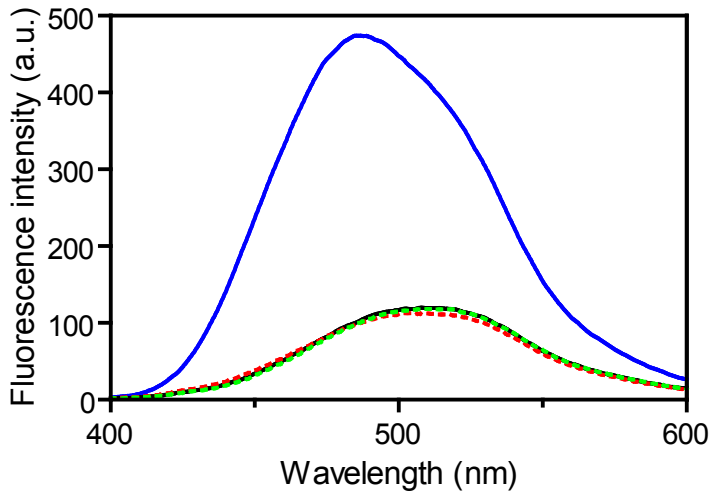

Supplement: pnas_0509100103_2.pdf [file pnas_0509100103_2.pdf]

Deviation from linearity (ppm)

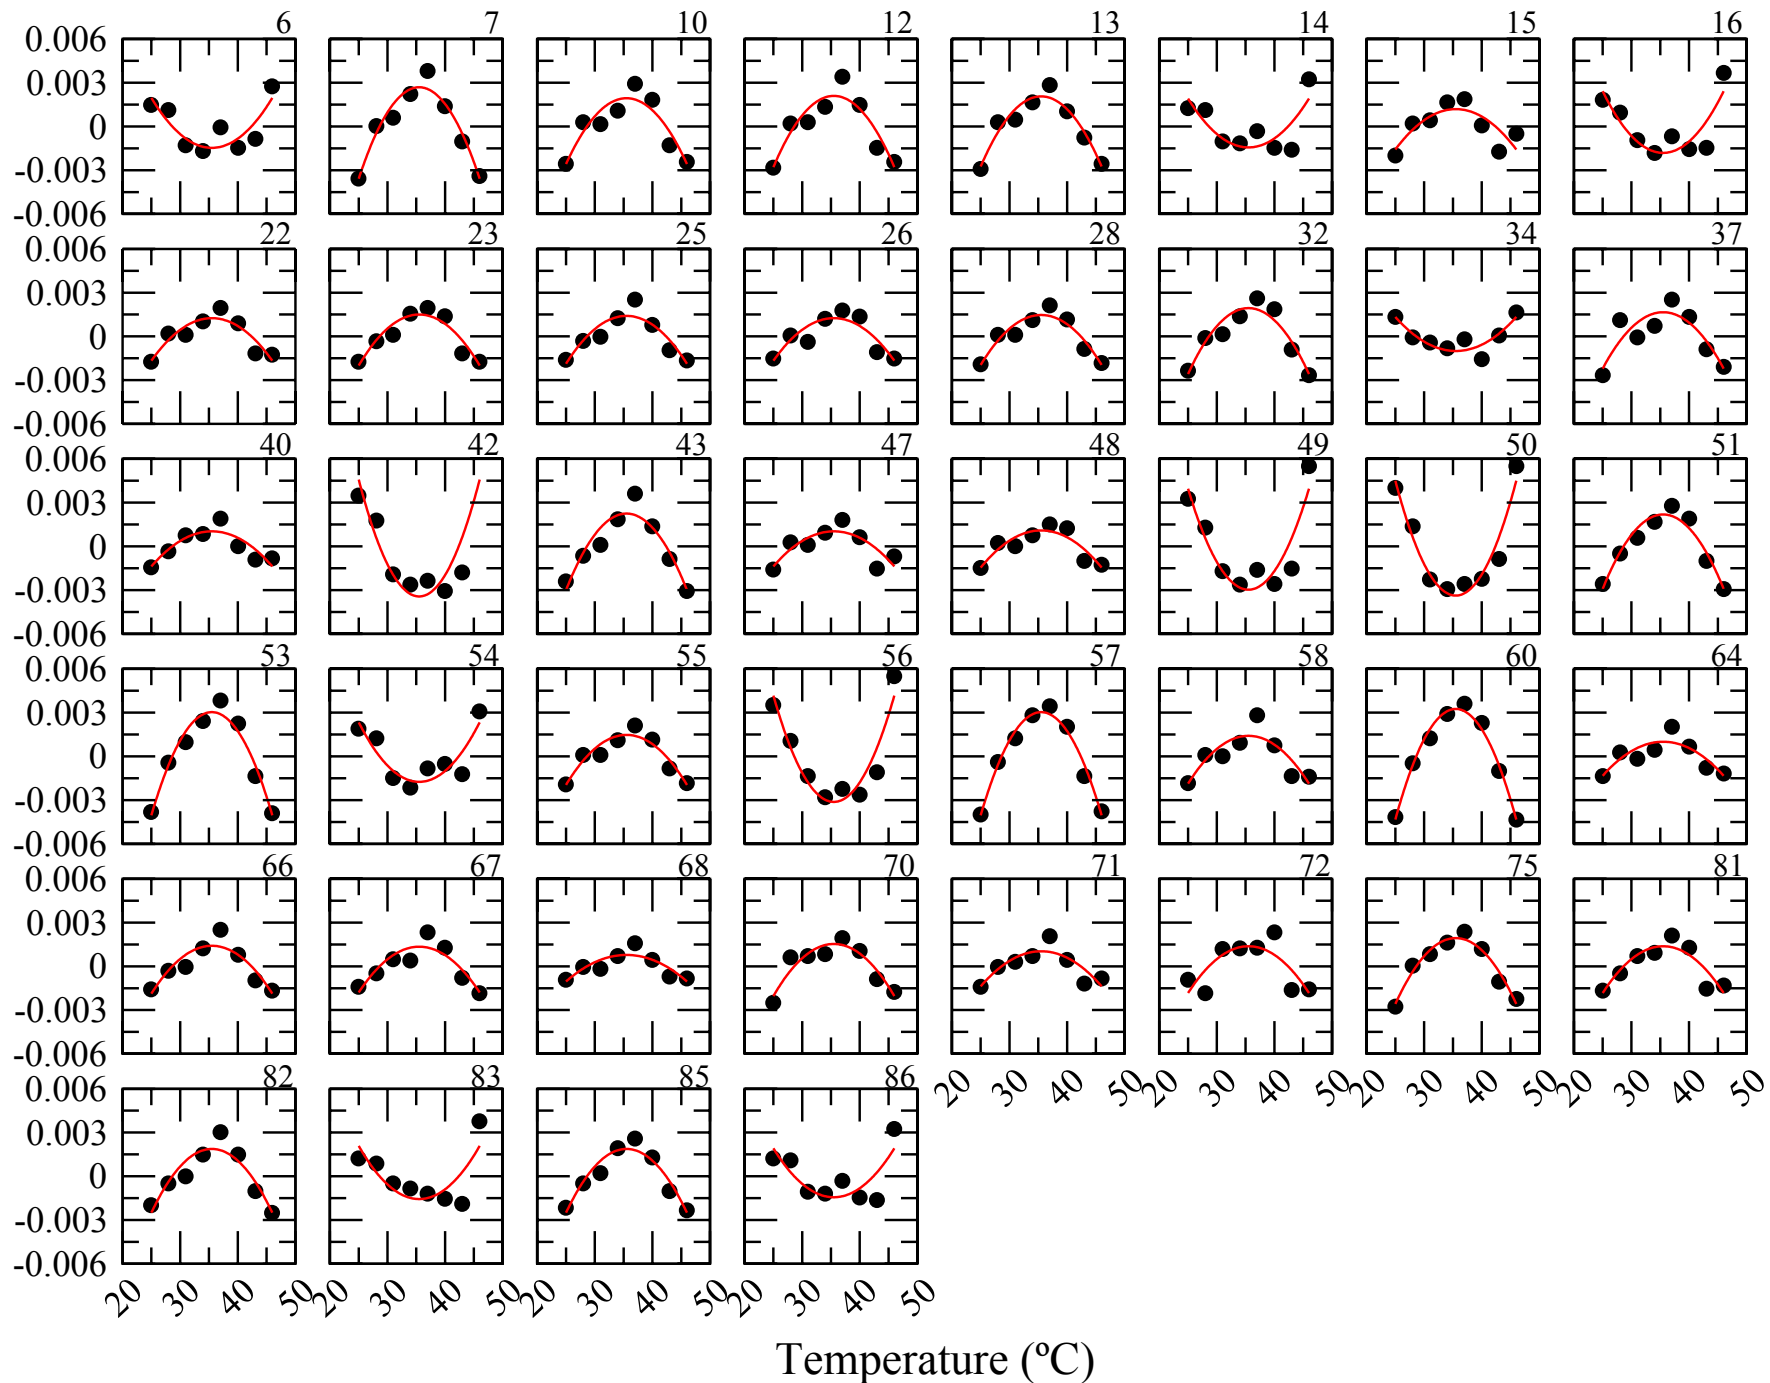

Supplement: pnas_0509100103_3.pdf [file pnas_0509100103_3.pdf]
